# Supplementary material
Source: MDPI journal article supplement (https://www.mdpi.com/2226-471X/6/1/17)
Supplement: s1 [file s1]

## Supplementary 1: Background information

Name: \_\_\_\_\_

Age: \_\_\_\_\_

### Degree of Hearing

Mild hearing loss: 26-40 dB \_\_\_\_\_

Moderate loss: 41-55 dB \_\_\_\_\_

## Part B: Language background

*Rate your level of English using these terms:*

**Basic** – you can communicate on simple topics or know some phrases in this language.

**Conversational** – you can communicate on everyday topics with minor grammar or vocabulary mistakes but you can't write in this language.

**Fluent** – you have the ability to express any idea without hesitation, with good vocabulary and grammar; people understand you easily. Both your spoken and written skills are good.

**Proficient** – different from fluent in the way that you now understand the structure of the language and you can explain how this language works to other people. You also can use idiomatic language and understand local accents

## Supplementary 2: Questions

### Part 1. With Norwegian subtitles

#### Comprehension task

1. Where does Felix come from?
  - a) North-Germany
  - b) South-Germany x
  - c) East-Germany
  - d) I do not know
2. What did Felix make on his bike trip?
  - a. A documentary x
  - b. New friends and family
  - c. A new album
  - d. I do not know
3. Why did they have to be at the Canadian border so soon?
  - a. Their visa was running out x
  - b. Their dog did not enjoy travelling on the bus
  - c. They wanted to see and experience as much as possible
  - d. I do not know

#### Vocabulary/word definition task

1. “We were never really passionate about cycling, so we needed a new...”
  - a. Way of transportation
  - b. Means of transportation x
  - c. Transportation unit
  - d. I do not know
2. “Less planning, more...”
  - a. Credibility
  - b. Anxiety
  - c. Flexibility x
  - d. I do not know
3. “Repulsion” means?
  - a. To reconstruct something
  - b. To get the feeling of wanting to travel
  - c. To feel disgust
  - d. I do not know

## Part 2. With English subtitles

### Comprehension task

1. Where did the travelers meet the Canadian couple?
  - a. Banff
  - b. Lac des Mille Lacs x
  - c. Alaska, at the border
  - d. I do not know
2. What is the hole in the floor in the truck for?
  - a. It is used for fishing on the ice x
  - b. It is used as a toilet
  - c. It is used for hunting
  - d. I do not know
3. What do they love about Banff?
  - a. Cooking meals in their bus
  - b. The people that live there
  - c. Going on walks with their dog Rudi, returning to their cozy home and the breathtaking nature x
  - d. I do not know

### Vocabulary task

#### Fill in the correct word

1. “And it’s exciting too, because we never know what... us”
  - a. Awaits x
  - b. Waits for
  - c. Nears
  - d. I do not know
2. “No... just living the life, live in the moment”
  - a. Apartments
  - b. Appointments x
  - c. Expectations
  - d. I do not know
3. What does Felix mean when he says the nature is “breathtaking” ?
  - a. Extremely beautiful x
  - b. There is little air up in the mountains
  - c. It is okay
  - d. I do not know

### Part 3. Without subtitles

#### Comprehension task

1. What do they think is most challenging about travelling
  - a. The roads are bad x
  - b. That their visa is about to run out
  - c. Not understanding what the people were saying
  - d. I do not know
2. What does Felix feel about driving through Denali national park?
  - a. Scary, as the bus was about to break down
  - b. That it was the best ride of his life
  - c. It was extremely challenging due to the roads x
  - d. I do not know
3. Why do they celebrate with a dance?
  - a. They had been driving 10.000 kilometers
  - b. Their visa became valid x
  - c. They were cherishing the breathtaking nature
  - d. I do not know

#### Vocabulary task

Fill in the blank space with the correct word

1. We are five miles away from the... to Alaska
  - a. Bridge
  - b. Boundary
  - c. Border x
  - d. I do not know
2. "Usually it's all ..."
  - a. Sold out x
  - b. Full
  - c. Booked out
  - d. I do not know
3. "The road was all ... and bumpy roads"
  - a. Gravel x
  - b. Sandy
  - c. Gifted
  - d. I do not now
